# Supplementary material
Source: PubMed Central journal article supplement (PMC2435182)

**Supporting Information for**

**Cytotoxic Clerodane Diterpenoids and Their Hydrolysis Products from**

***Casearia nigrescens* from the Rainforest of Madagascar**

Russell B. Williams, Andrew Norris, James S. Miller, Chris Birkinshaw, Fidy Ratovoson, Rabodo  
Andriantsiferana, Vincent E. Rasamison, and David G. I. Kingston

**Contents:**

**$^1\text{H}$  and  $^{13}\text{C}$  NMR Spectra of Compounds 1 - 4 and 6 - 7**

<sup>1</sup>H NMR spectrum of **1**

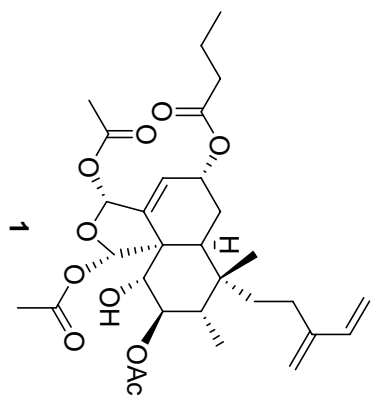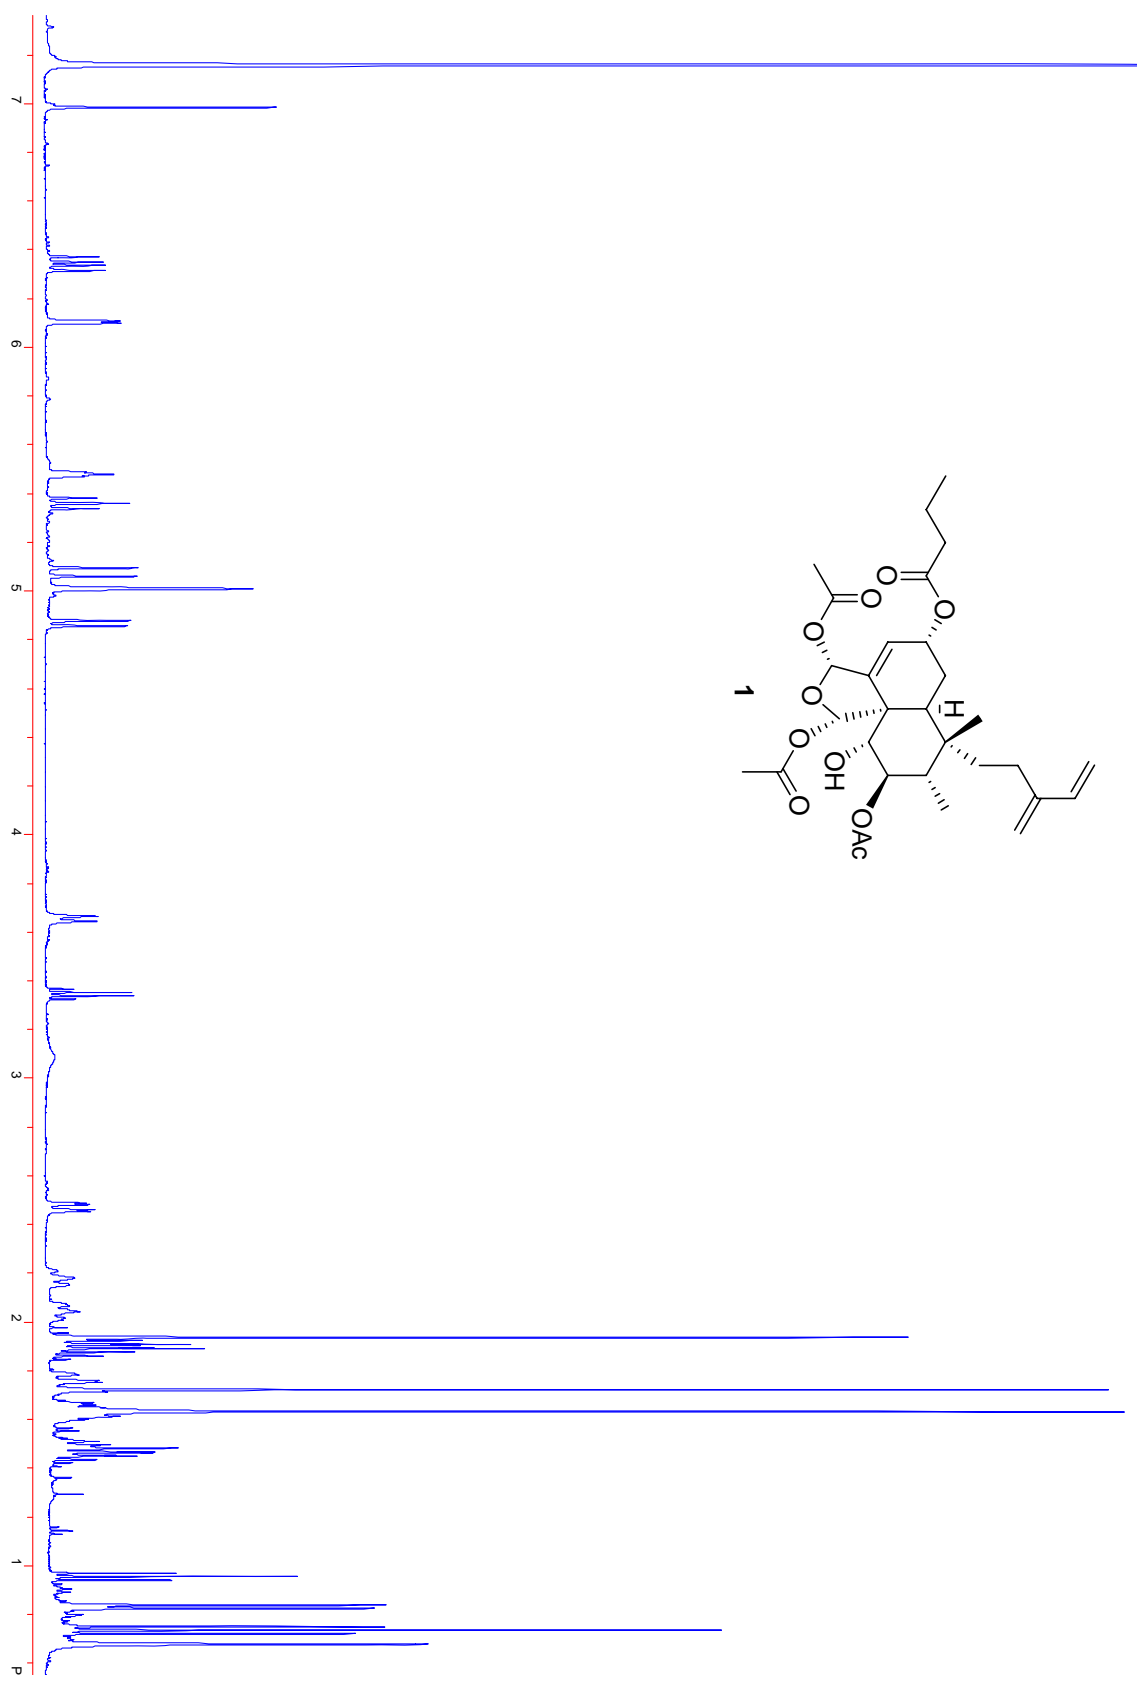

$^{13}\text{C}$  NMR spectrum of **1**

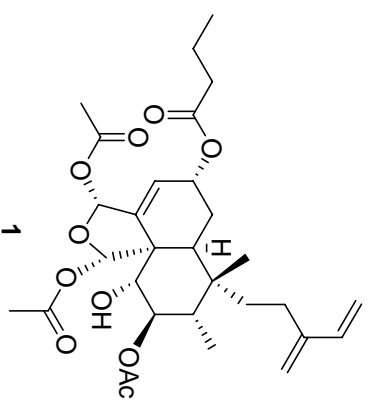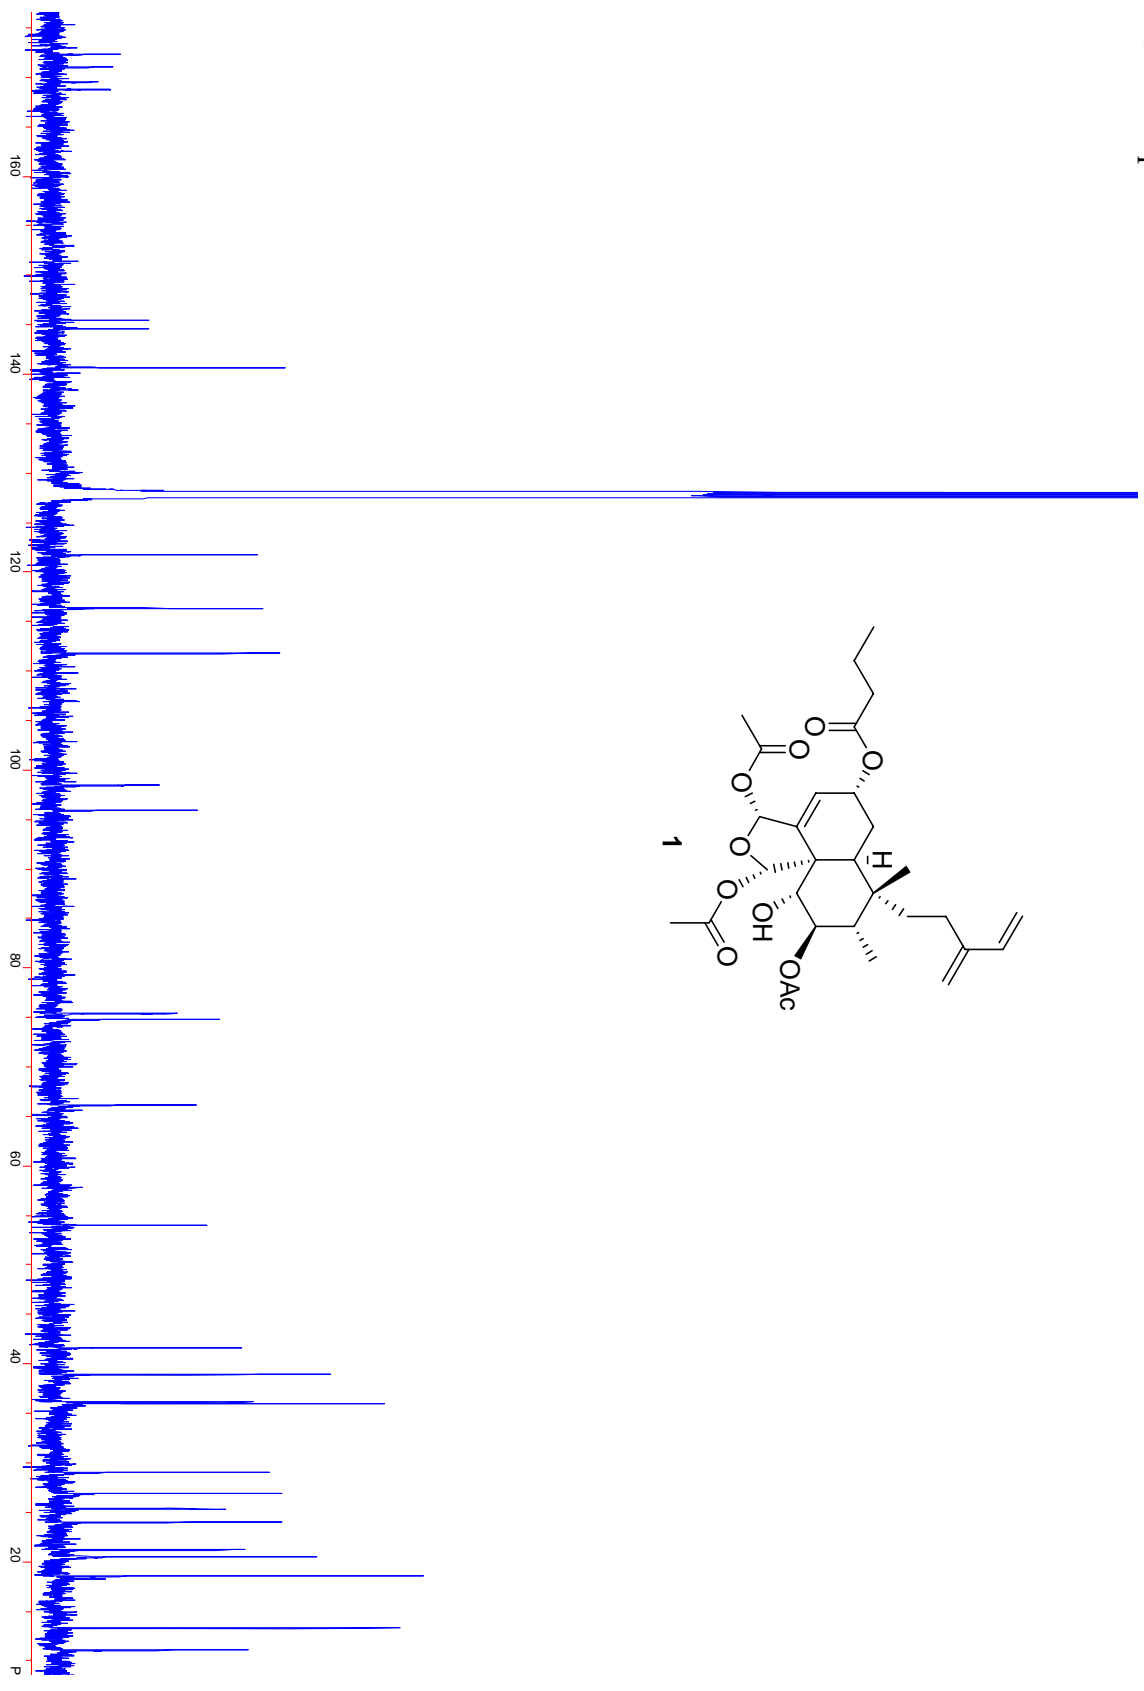

<sup>1</sup>H NMR spectrum of **2**

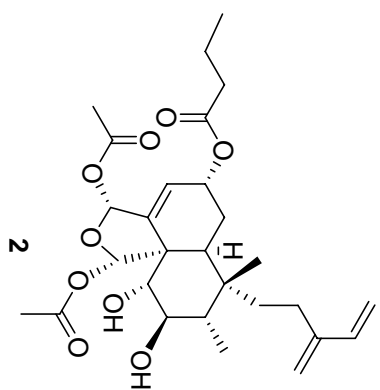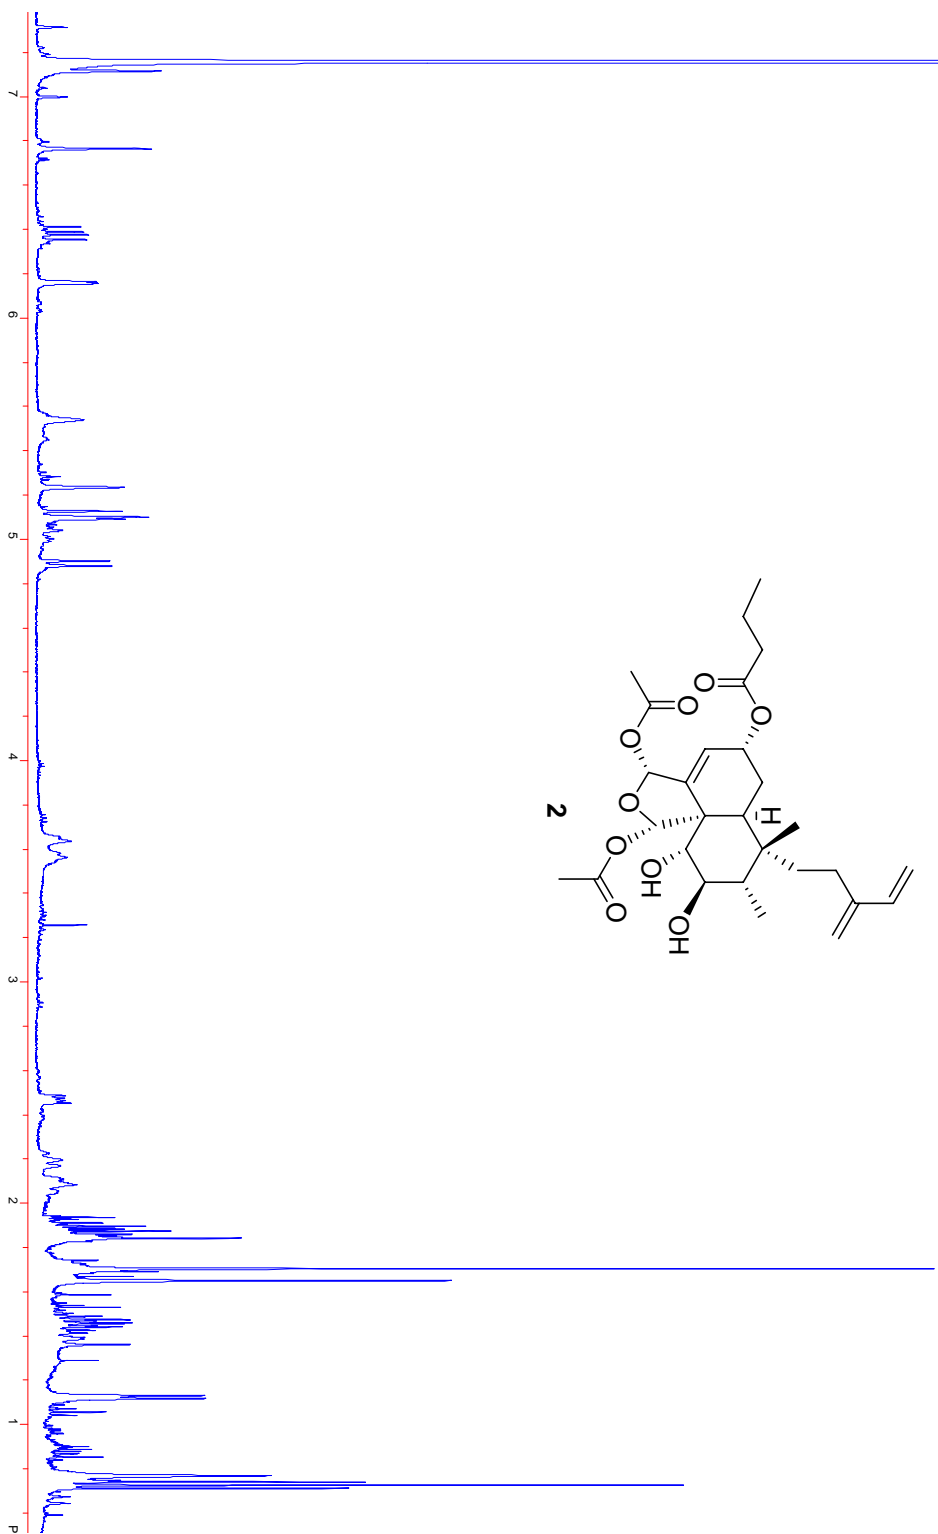

$^{13}\text{C}$  NMR spectrum of **2**

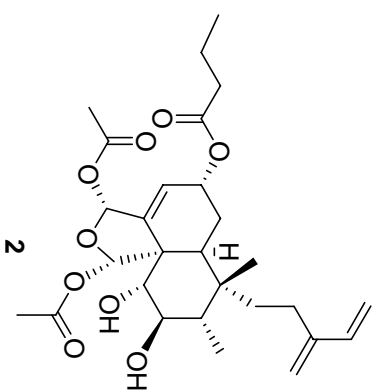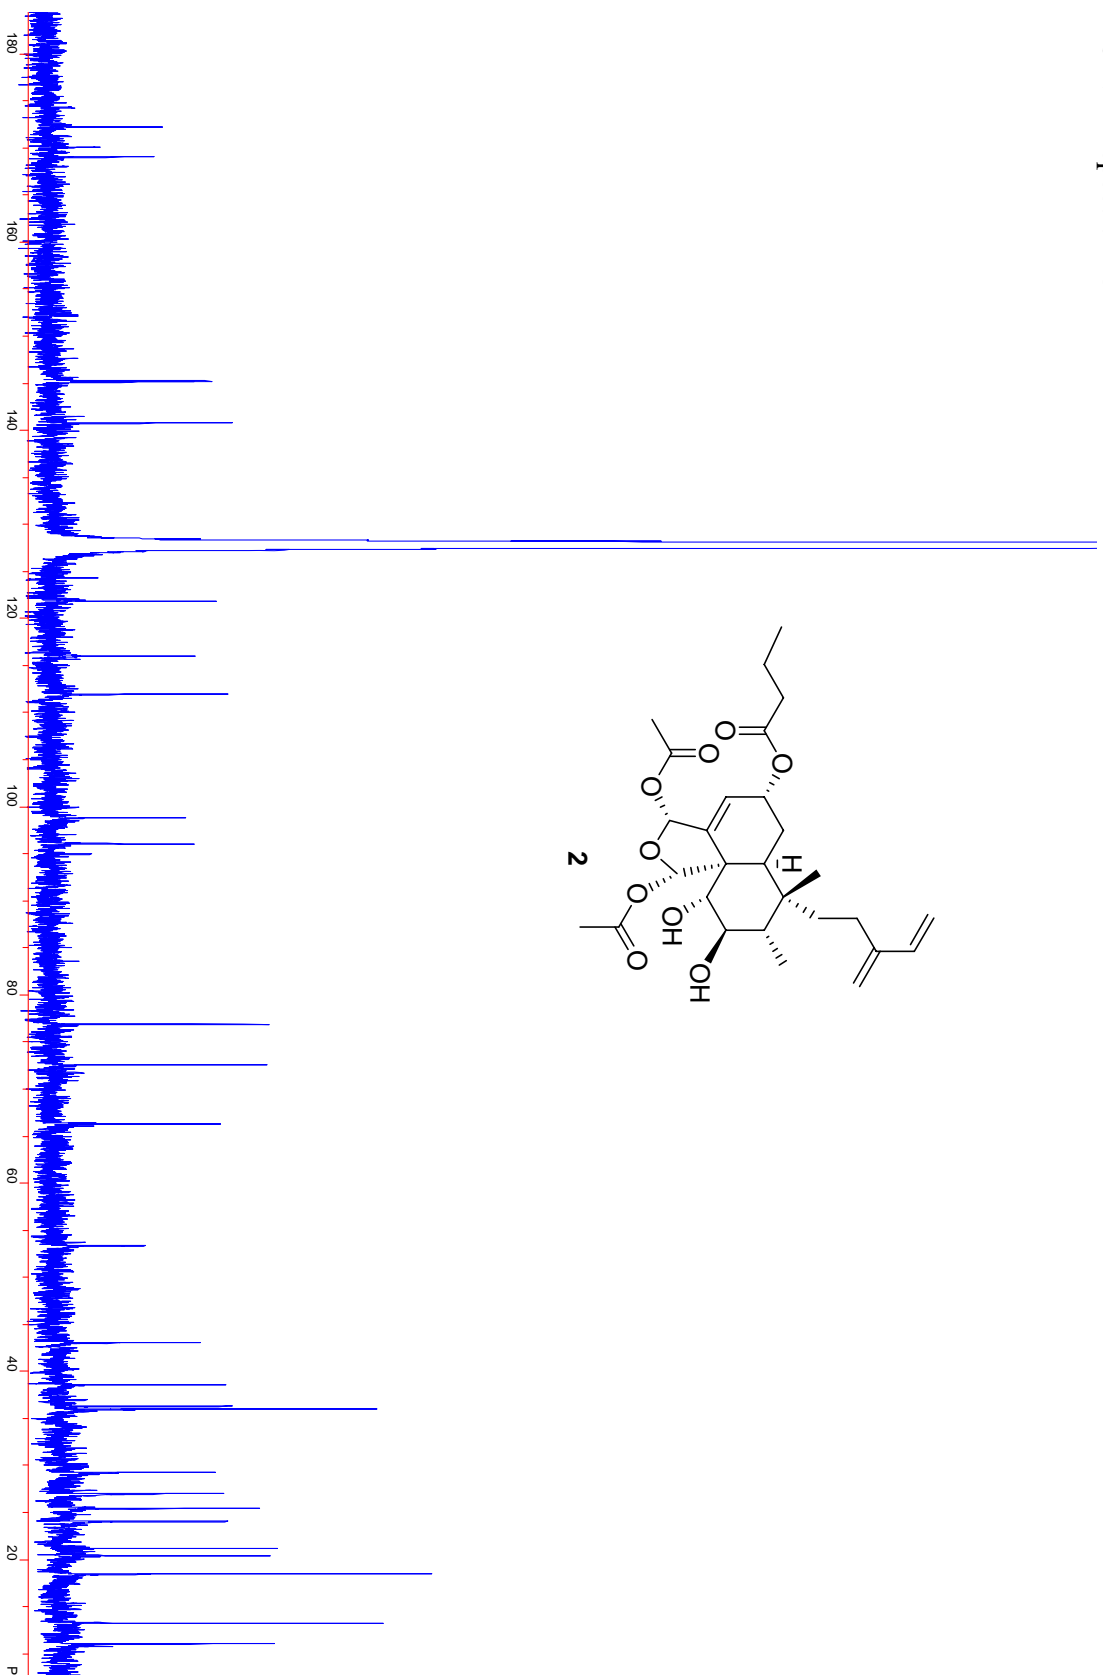

$^1\text{H}$  NMR spectrum of **3**

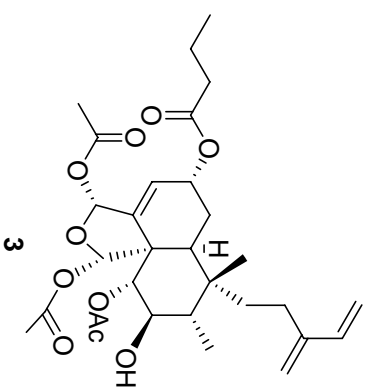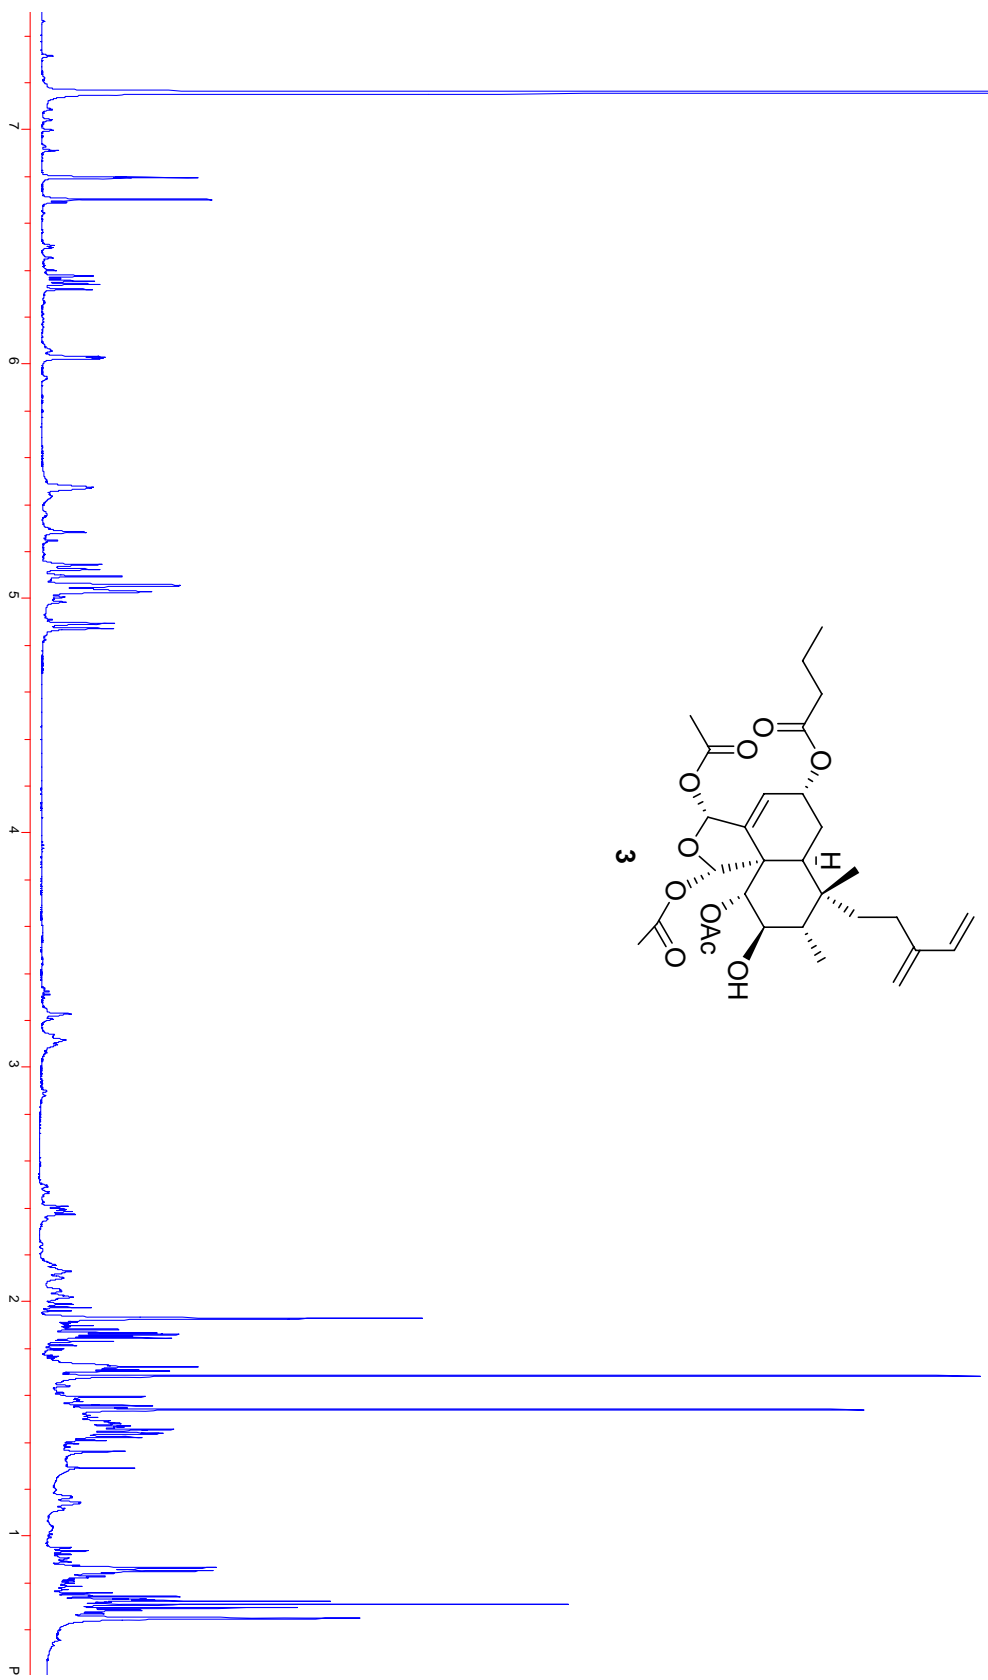

<sup>13</sup>C NMR spectrum of **3**

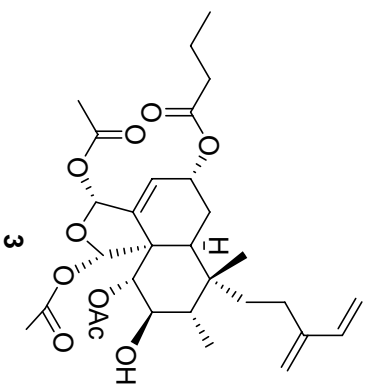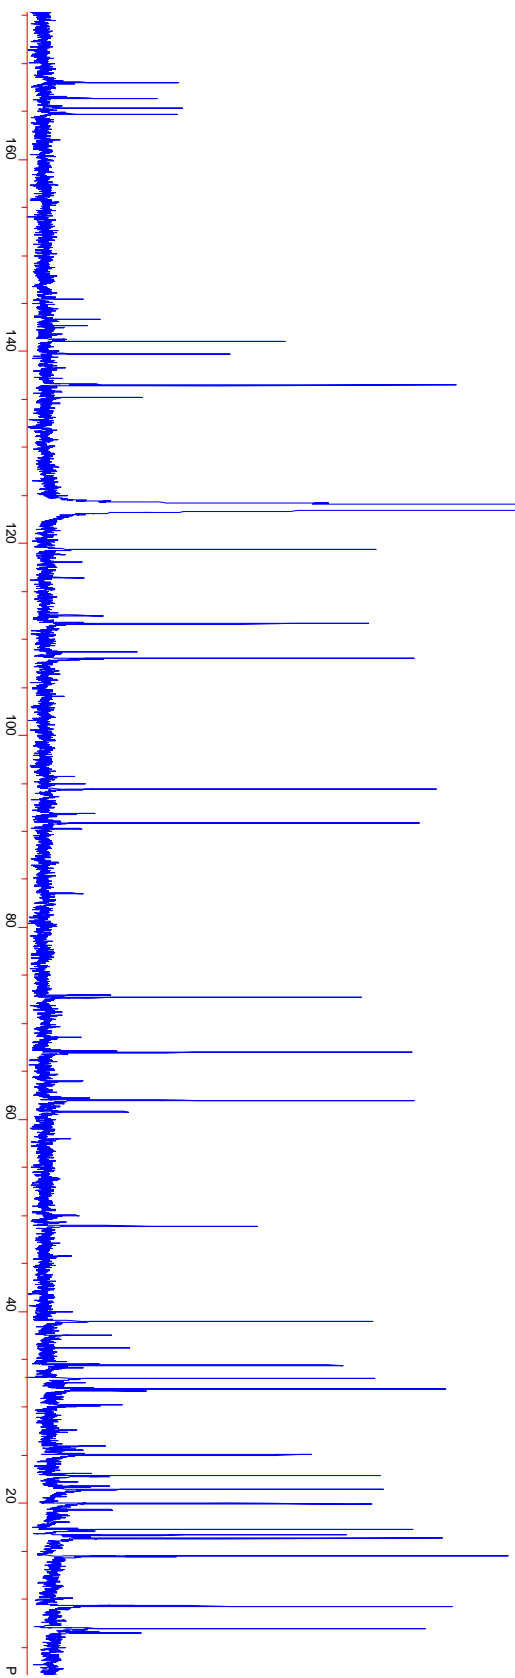

<sup>1</sup>H NMR spectrum of **4**

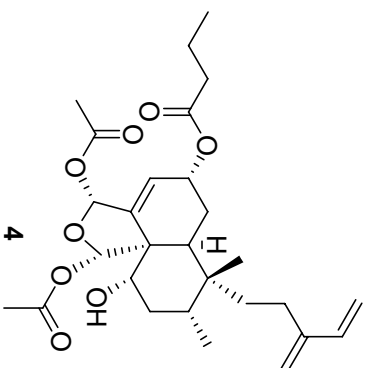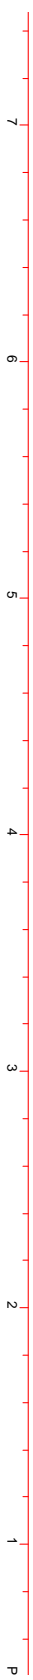



$^{13}\text{C}$  NMR spectrum of **4**

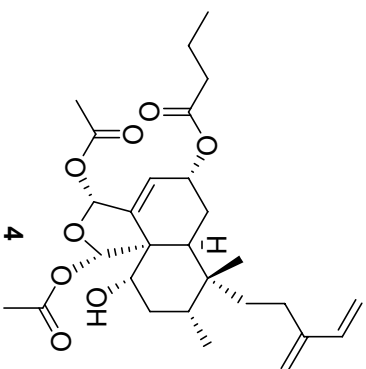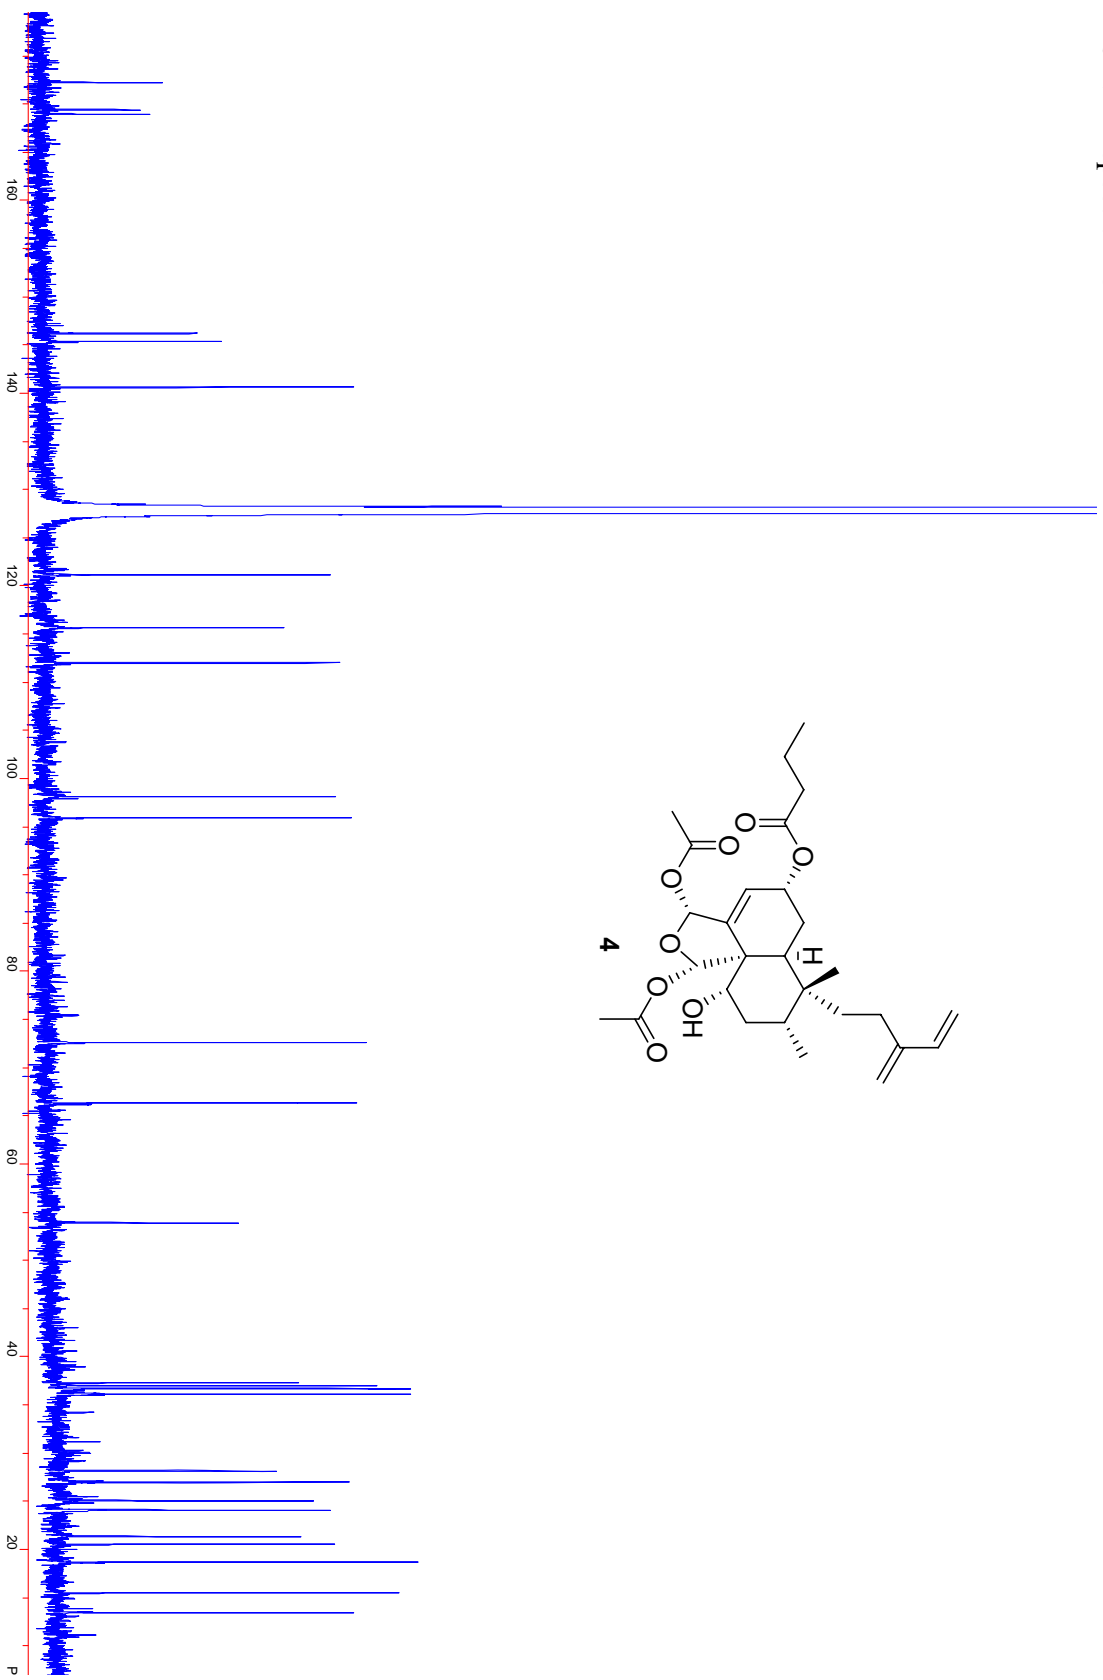



<sup>1</sup>H NMR spectrum of 7

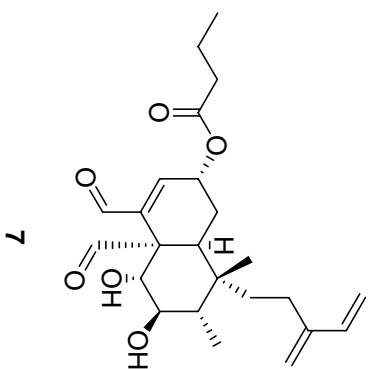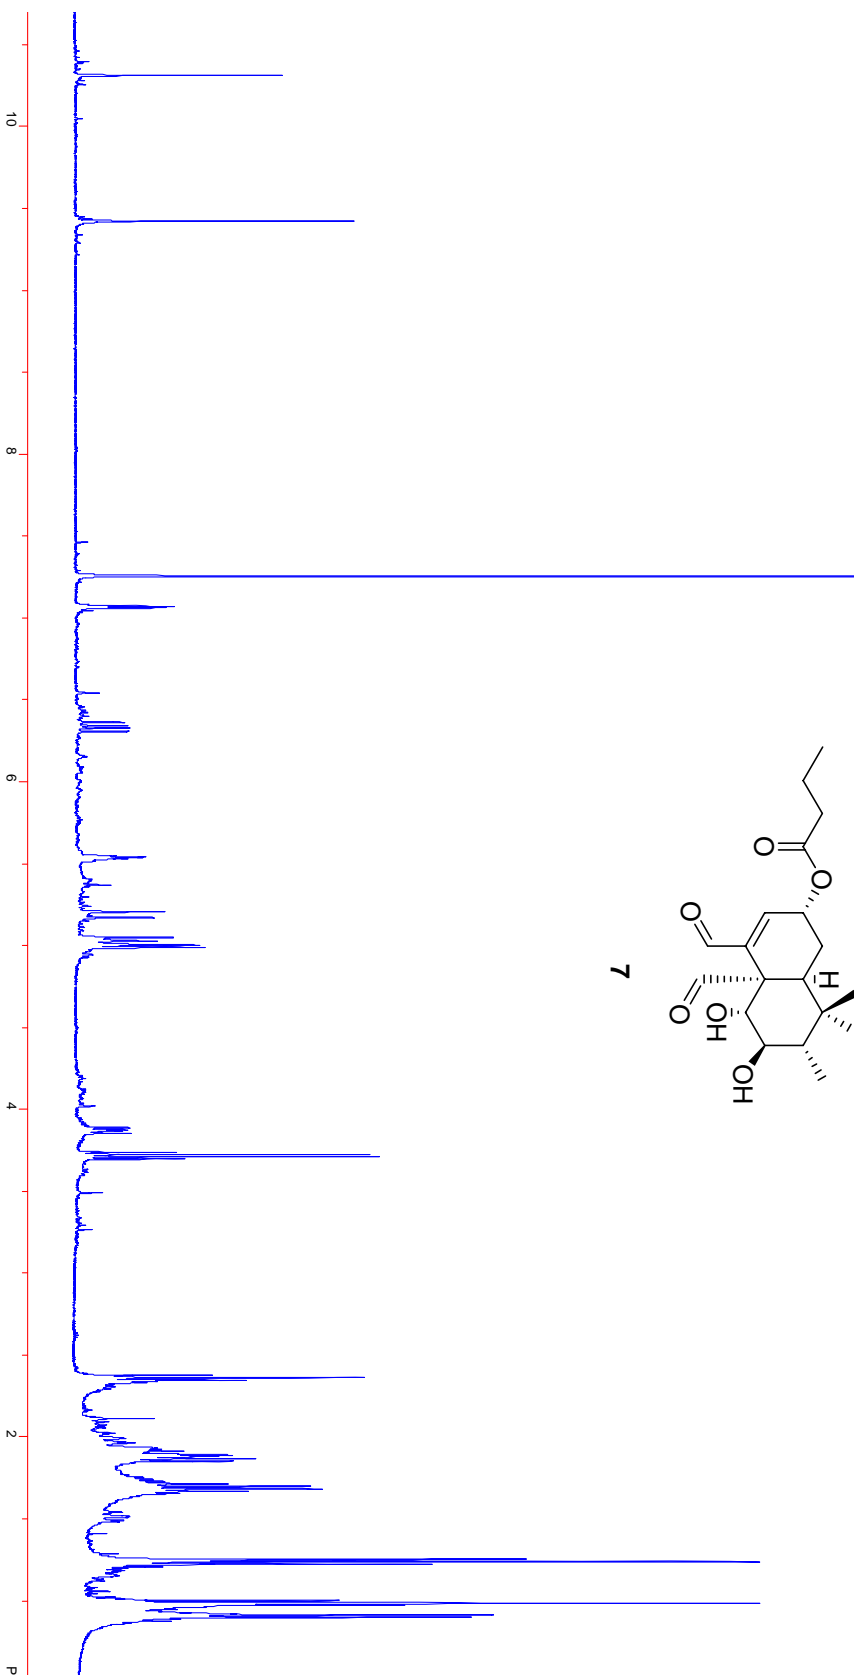

$^{13}\text{C}$  NMR spectrum of **7**

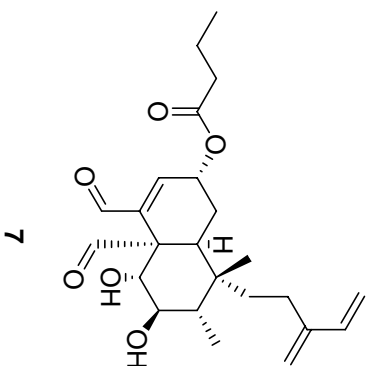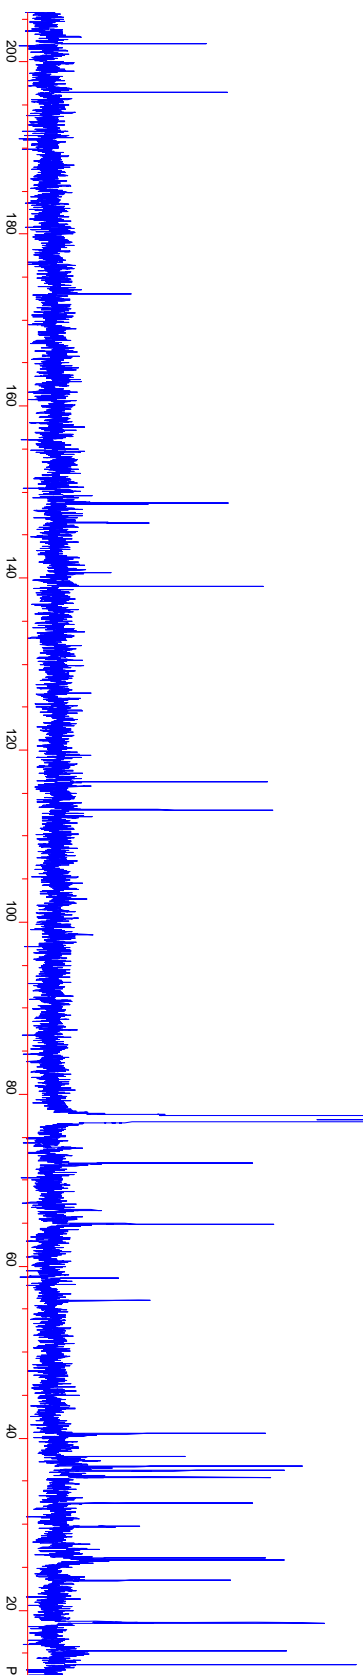

Supplement: NIHMS49553-supplement-1.pdf [file NIHMS49553-supplement-1.pdf]
